# Supplementary material for: Summertime response of ozone and fine particulate matter to mixing layer meteorology over the North China Plain
Source: Copernicus journal article supplement (doi:10.5194/egusphere-2023-479), 2023-07-03
Supplement: Supplementary file 1 [file egusphere-2023-479-supplement.pdf]

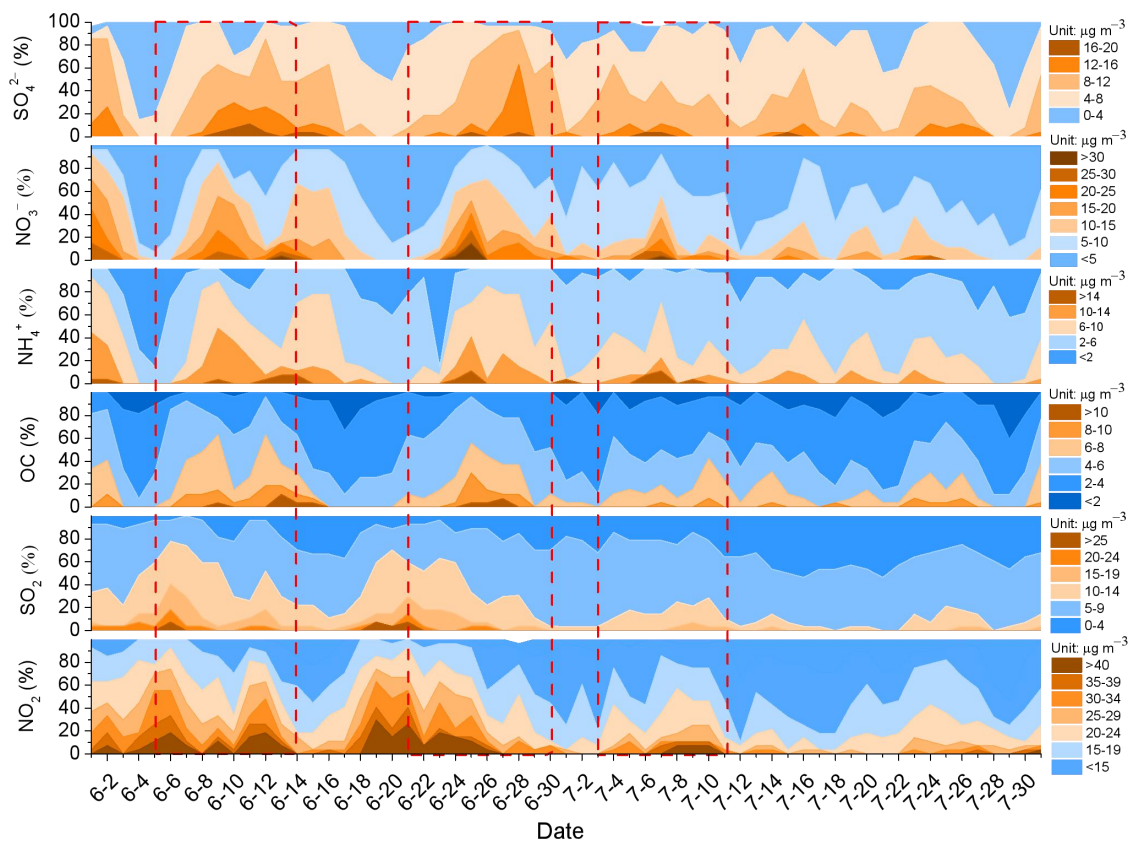

**Figure S1.** The frequency (% , ratio of occurrence cities to total NCP cities) of  $\text{SO}_4^{2-}$ ,  $\text{NO}_3^-$ ,  $\text{NH}_4^+$ , OC, and gaseous pollutants ( $\text{SO}_2$  and  $\text{NO}_2$ ) in the NCP from June 1 to July 31, 2021. The color shading represented different categories classified by  $\text{SO}_4^{2-}$ ,  $\text{NO}_3^-$ ,  $\text{NH}_4^+$ , OC, and gaseous pollutants levels. The red dash boxes represent three typical  $\text{PM}_{2.5}$  and  $\text{O}_3$  pollution episodes.

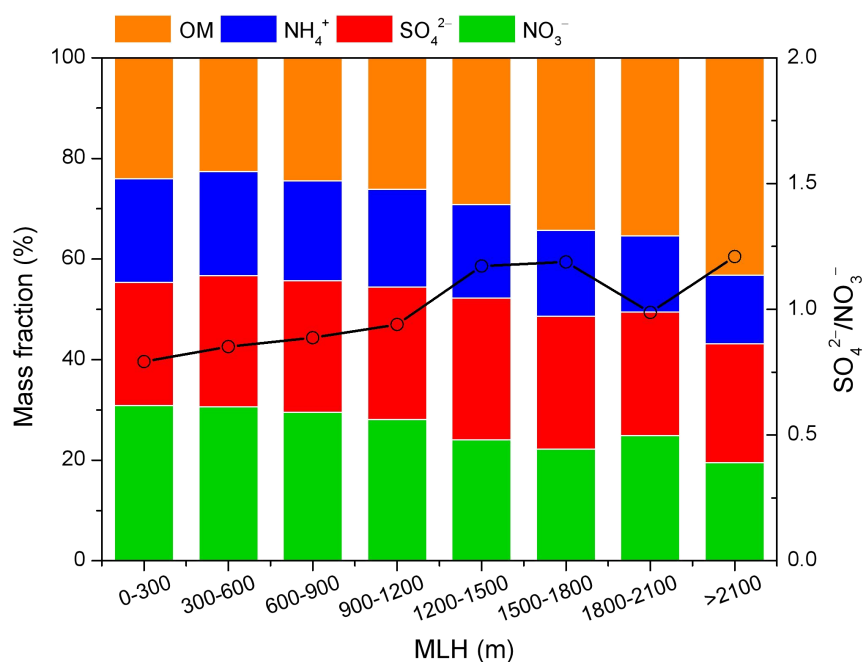

**Figure S2.** The mass fractions of major  $\text{PM}_{2.5}$  components and the mass ratio of  $\text{SO}_4^{2-}$  to  $\text{NO}_3^-$  in different MLH conditions.

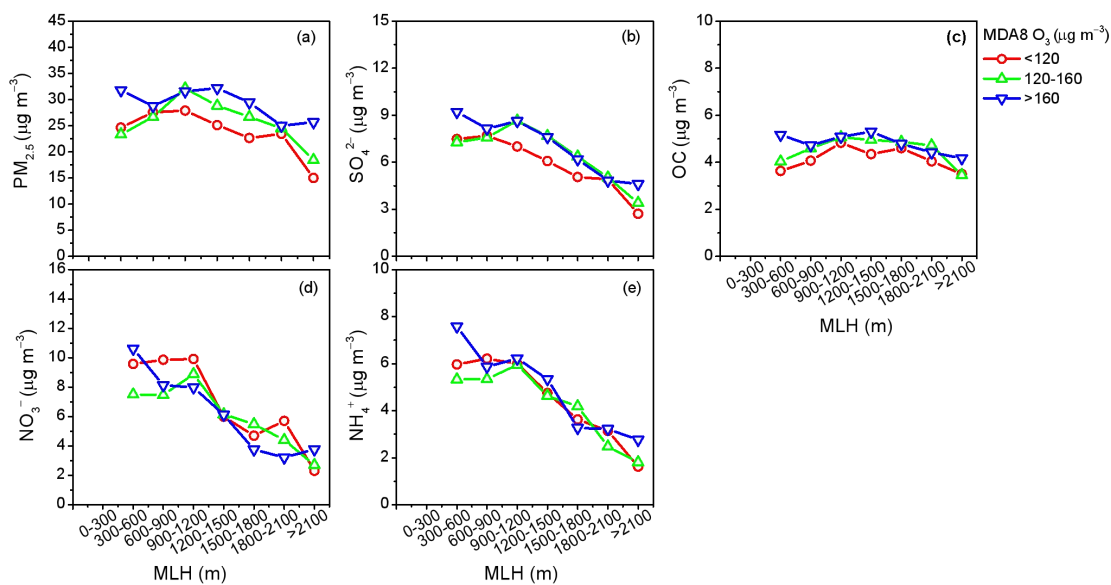

**Figure S3.** The distribution characteristics of (a)  $\text{PM}_{2.5}$ , (b)  $\text{SO}_4^{2-}$ , (c) OC, (d)  $\text{NO}_3^-$ , and (e)  $\text{NH}_4^+$  concentrations with the evolution of MLH under different MDA8  $\text{O}_3$  conditions. Note that rainy days were excluded.
