# Supplementary material for: Summertime response of ozone and fine particulate matter to mixing layer meteorology over the North China Plain
Source: Copernicus journal article supplement (doi:10.5194/egusphere-2023-479), 2023-07-03
Supplement: Supplementary file [file egusphere-2023-479-AC2-supplement.pdf]

## A point-by-point response to the reviews

Thank you for your valuable comments. The followings are our responses to your comments.

### Response to Reviewer #1

**Comment 1:** The article contains highly relevant results for the understanding of ozone and secondary PM episodes. This is especially important in areas where the WHO guidelines are widely exceeded. The relationship between the MLH and the measured concentrations can help diagnose more precisely the underlying causes of these high pollution episodes during the summer. Consequently, it is relevant for proper air quality control strategies.

While the results are important and support the authors' conclusions, there seems to be a lack of depth in their analysis. Additionally, there is a noticeable absence of indication regarding potential limitations and uncertainties in this study.

**Answer:** Thank you for your approval. According to your valuable comments, we have made significant revisions to our revised manuscript. The purpose of this work was to gain new insights into the underlying causes of the summertime O<sub>3</sub>–PM<sub>2.5</sub> coordinated pollution through exploring the response of ozone and fine particulate matter to mixing layer meteorology over the North China Plain from June 1 to July 31, 2021. However, there remained some limitations and uncertainties in this work. First, the present study was only confined to summertime conditions (including two summer months) in the NCP, and the conclusions was likely to be different in other seasons and regions. Thus, more extended observations in time and space should be needed in the future. Second, to avoid the influence of diurnal boundary layer cycles, in this article we focused on the relationships between daily mean air pollutants and meteorological factors. We have also taken PuY and HeZ as examples to explore the relevance of hourly O<sub>3</sub>, PM<sub>2.5</sub>, its components and MLH. The results showed large diurnal as well as day-to-day variability in the O<sub>3</sub> and PM<sub>2.5</sub> levels. The decrease in PM<sub>2.5</sub> at daytime with the rise of MLH can be partly offset by an increment in secondary pollutants formation derived from O<sub>3</sub> growth. In general, the conclusions in this work was only suitable to the day-to-day relationship between air pollutants and MLH. The hourly relationships were much more complicated and need more further analysis. Lastly, a weakness of this study is that we did not quantify the sensitivity of O<sub>3</sub> and PM<sub>2.5</sub> to different meteorological factors and chemical processes, thus a more detailed consideration with the aid of modeling would be needed in the future. Such an exploration requires efforts going beyond the current project, and it is therefore not pursued. The above discussion has been added in our revised manuscript. (Page 21, line 449–451; page 26, line 521–525; page 28, line 558–564)

**Comment 2:** The analyzed results are limited to only two summer months, which may not be easily extrapolated to other summers. It is essential to address why the

three mentioned episodes are relevant and whether the selected two months are representative of typical patterns observed throughout the years. Were there any meteorological anomalies during this period? These aspects should clear throughout the entire manuscript to provide a more comprehensive understanding of the study's scope and implications.

**Answer:** Thank you for your valuable comments. We considered the months of June and July can well represent the typical characteristics of O<sub>3</sub>-PM<sub>2.5</sub> coordinated pollution during warm seasons in the North China Plain (NCP). According to the hourly concentrations of PM<sub>2.5</sub> and MDA8 O<sub>3</sub> in China over the years of 2013–2020, the observed numbers of O<sub>3</sub> polluted days (MDA8 O<sub>3</sub> concentration > 160 μg m<sup>-3</sup> and PM<sub>2.5</sub> < 75 μg m<sup>-3</sup>), PM<sub>2.5</sub> polluted days (MDA8 O<sub>3</sub> concentration < 160 μg m<sup>-3</sup> and PM<sub>2.5</sub> > 75 μg m<sup>-3</sup>), and O<sub>3</sub>-PM<sub>2.5</sub> co-polluted days (MDA8 O<sub>3</sub> concentration > 160 μg m<sup>-3</sup> and PM<sub>2.5</sub> > 75 μg m<sup>-3</sup>) were highest in the North China Plain (NCP). Besides, O<sub>3</sub>-PM<sub>2.5</sub> co-polluted days and O<sub>3</sub> polluted days were generally occurred in June and July (Dai et al., 2023). According to the National Ambient Air Quality Standard of China (GB3095-2012), the daily PM<sub>2.5</sub> averages in “2+26” cities can meet the Level II national ambient air quality standard (75 μg m<sup>-3</sup>), while exceeding the level I standard of 35 μg m<sup>-3</sup>. Here, we defined a O<sub>3</sub>-PM<sub>2.5</sub> co-polluted episode as a set of continuous days (longer than 4 days) with MDA8 O<sub>3</sub> and daily mean PM<sub>2.5</sub> in more than 10 % NCP cities exceeding 160 μg m<sup>-3</sup> and 35 μg m<sup>-3</sup>, respectively. According to this criterion, three typical O<sub>3</sub>-PM<sub>2.5</sub> co-polluted episodes were selected: June 4–14 (Episode I), June 18–29 (Episode II), and July 2–11 (Episode III), 2021. These three episodes have been marked in Figure 2 in our revised manuscript. Comparing with the same observation period in 2020, the temperature was slightly higher and more precipitation events happened during the summertime in 2021 (National Bulletin of Atmospheric Environment, 2021; <http://www.nmc.cn/publish/environment/National-Bulletin-atmospheric-environment.htm>). Our work can provide an overall diagnosis of the response of ozone and fine particulate matter to mixing layer meteorology during summertime, especially in warm and humid seasons, in the NCP.

**Comment 3:** The acronyms OC and OM are mixed.

**Answer:** Thank you for your valuable comments. The mistakes have been corrected in our revised manuscript. The concentration of OM can be obtained by multiplying the OC concentration by a factor of 1.6 (Li et al., 2021). When discussing the change characteristics of mass concentration, we use acronyms OC, while when analyzing the mass fraction in PM<sub>2.5</sub>, the acronyms OM was used.

**Comment 4:** In the graphical abstract, it would be more convenient to increase the font size of the particle compounds. Regarding the arrow for ozone at the MLH between 900 and 1200, what does it mean? Is ozone not increasing, or is it at its maximum at that MLH? It would be clearer to have a separate arrow for O<sub>3</sub> and

PM<sub>2.5</sub>.

**Answer:** The arrow for ozone at the MLH between 900 m and 1200 m means the significant increase of O<sub>3</sub>. According to your suggestions, we have adjusted the font size of the particle compounds and separated the arrows for O<sub>3</sub> and PM<sub>2.5</sub> in the graphical abstract in our revised manuscript (Figure R1).

**Comment 5:** I feel that the statement on line 80 needs further elaboration. It goes from negative to positive, but why? Could it be due to them being more of a secondary type rather than primary, or have there been changes in emissions?

**Answer:** As indicated in previous studies (Chu et al., 2020), the correlation between PM<sub>2.5</sub> and O<sub>3</sub> tended to change from negative to positive as air quality improved (when the PM<sub>2.5</sub> concentration lower than 50 μg m<sup>-3</sup>). One speculative reason for this phenomenon is that PM<sub>2.5</sub> does not reduce actinic flux and HO<sub>2</sub> radical significantly when the PM<sub>2.5</sub> concentration was low in summer. On the other hand, PM<sub>2.5</sub> and O<sub>3</sub> tend to be positively correlated possibly due to their common precursors, such as VOCs and NO<sub>x</sub>, and their simultaneous generation in photochemical reactions. In addition, the generation of O<sub>3</sub> would also catalyze the generation of the secondary PM<sub>2.5</sub>, and both showed a trend of growing together (Wu et al., 2022). (Page 4, line 79–88)

**Comment 6:** Line 95, are those months the most "problematic"?

**Answer:** Yes, according to the hourly concentrations of PM<sub>2.5</sub> and MDA8 O<sub>3</sub> in China over the years of 2013–2020, the observed numbers of O<sub>3</sub> polluted days, PM<sub>2.5</sub> polluted days, and O<sub>3</sub>–PM<sub>2.5</sub> co-polluted days were the highest in June and July in the NCP. Therefore, we considered June and July can represent the typical characteristics of O<sub>3</sub>–PM<sub>2.5</sub> co-polluted days during warm seasons in the NCP.

**Comment 7:** In the map of Figure 1, it is advisable to specify the exact locations of the measurements. Are they conducted within cities? What environments have been selected, and what criteria were used for their selection? Is there any measurement that could be heavily influenced by local emissions? Additionally, another legend could indicate the locations of the soundings (vertical profiles) shown in Figure 9.

Line 106, the meteorological variables are measured at the same measurement site, right?

What is the temporal resolution of the meteorological measurements? Have they been averaged to obtain daily averages? It is not clear.

Line 117, "other pollutants" is too vague. What does it refer to?

**Answer:** According to your valuable suggestions, the data profile description has been added in our revised manuscript (Page 6–7, line 111–143). Our field observations were conducted based on the existing ground-level observation stations

(national control station, PM<sub>2.5</sub> component network, etc.) in the North China Plain (NCP), which covered two megacities (BeiJ and TianJ) and 26 surrounding cities. The spatial distribution of these 28 valid sites was shown in Figure 1. Hourly concentrations of ground-level SO<sub>2</sub>, NO<sub>2</sub>, O<sub>3</sub>, PM<sub>2.5</sub> and its chemical compositions (SO<sub>4</sub><sup>2-</sup>, NO<sub>3</sub><sup>-</sup>, NH<sub>4</sub><sup>+</sup>, and OC), and meteorological variables, including air temperature (T), relative humidity (RH), wind speed (WS) and direction (WD), and 24-h accumulated precipitation, at the sites were obtained from the platform of National Atmospheric Particulate Chemical-Speciation-Network. This network is established to improve the understanding of the heavy pollution formation mechanism in the North China Plain (NCP) and support the decision-making of local governments and state administration. Hourly SO<sub>2</sub>, NO<sub>2</sub>, O<sub>3</sub>, PM<sub>2.5</sub> and its chemical compositions were recorded at the PM<sub>2.5</sub> component network, which was selected followed the Technical Regulation for Selection of Ambient Air Quality Monitoring Station published by the Ministry of Ecology and Environment of the People's Republic of China (HJ664-2013). The monitoring sites of PM<sub>2.5</sub> component network were mostly set up within the cities, and can reflect the average pollution level of each city. Details for the near-ground observation stations of PM<sub>2.5</sub> component network were shown in Table R1. The meteorological variables were recorded in the national meteorological observation stations, and the information of each station can be obtained from the public website of China Meteorological Administration (<http://data.cma.cn/data/cdcindex/cid/0b9164954813c573.html>). It should be noted that the measurement sites of meteorological variables and air pollutants were not always consistent. To better analyze the meteorological conditions for O<sub>3</sub> and PM<sub>2.5</sub>, only the station closed to the air quality monitoring station and representative of the city meteorological condition was selected in our work. The temporal resolution of air temperature, RH, WS and WD was 1-h. To avoid the influence of diurnal boundary layer cycles, in this article we focused on the relationships between daily mean air pollutants and meteorological factors. The daily mean meteorological factors, PM<sub>2.5</sub> and its major secondary components were calculated from the hourly data; daily O<sub>3</sub> concentration was characterized by the maximum daily 8 h average ozone (MDA8 O<sub>3</sub>). Details for the near-ground observation species and the metrics were shown in Table R2. It's noted that when we rechecked the observation data, it's found that the calculated maximum daily 8 h average ozone (MDA8 O<sub>3</sub>) in the original manuscript was incorrect, and the average of daily 8 h average ozone was misused. We have replaced the value of MDA8 O<sub>3</sub> in the whole article and carefully checked the accuracy of all observation data in the revised manuscript.

“Other pollutants” refers to NO<sub>2</sub> and SO<sub>2</sub>, and we have made it clear in our revised manuscript. (Page 6, line 132)

According to the valuable suggestion of Reviewer #2, the ozone radar has great shortcomings in the summer when there are clouds and high humidity, and the data may send wrong message and misled readers. Therefore, we deleted the soundings part in our revised manuscript.

**Comment 8:** Point 2.2. The methodology for calculating the MLH seems somewhat

simplistic. While estimating MLH can be complex, it would be advisable to compare the results with sounding data (already shown) or reanalysis data to determine their coherence with the calculated values.

**Answer:** Thank you for valuable comments. Even though the method for calculating MLH in this work seems simple, this methodology reflects the basic physical nature of the pollution mixing layer height. In recent years, many works have progressed in the atmospheric boundary layer characteristics, and analyzed the impacts of these parameter on air pollution. Planetary boundary layer (PBL), as one of the critical parameters to air quality modeling, has been well explored. However, PBL usually refers to the large-scale Ekman dynamic boundary layer (Haugen et al., 1971; Wang et al., 2014; Zhang et al., 2005). The way with which boundary layer describes the influences of air pollution is easily duplicated and confused (Niu et al., 2017). It is unreasonable to some extent, if the characteristic of the air pollution related to near-surface boundary layer is evaluated by using the concept of PBL. For air pollution measurement, one of selected functionalities of parameterization scheme for pollution mixing layer is to judge whether an air mass over a specific locality satisfies the “static and stable” attribute or not. Therefore, in this work, to express the basic physics for diagnosing meteorological conditions, we used the concept of pollution mixing layer height (MLH) proposed by Wang et al. (2017), which was based on the classical synoptic theory according to the level of convective condensation layer, and the details of this method can be seen in previous work (Wang and Yang, 2000; Wang et al., 2017).

To be specific, we defined the height close to the cloud base as the height of super-saturation layer (H\_SSL), and the isentropic atmospheric process meets the level of convective condensation layer (LCL) in the super-saturation state, i.e., it is very close to the H\_SSL. Iterative algorithm is used to work out the H\_SSL (Wang and Yang, 2000):

$$H_{SSL} \approx LCL = 6.11 \times 10^2 \times \left( \frac{0.622 + 0.622 \frac{e_s}{p - e_s}}{0.622 \frac{e_s}{p - e_s}} \right) \quad (1)$$

$$e_s = 6.22 \times \exp \frac{17.13(T - 273.16)}{T - 38} \quad (2)$$

where  $e_s$  represents saturated water vapor pressure,  $T$  is temperature (K). Eq. (1) can be used to calculate the H\_SSL which is favorable for pollutant mixing and represented by (P). Below this height, the atmosphere gets supersaturated, causing the pollution mixing and wetting process in the low altitude to continue, so this height is also called the height of pollution mixing layer (MLH). Thus, MLH can be derived in the following expression:

$$MLH \approx H_{SSL} \approx LCL = 6.11 \times 10^2 \times \left( \frac{0.622 + 0.622 \frac{e_s}{p - e_s}}{0.622 \frac{e_s}{p - e_s}} \right) \quad (3)$$

Several works have verified the reliability of the results based on this method. With this method, Wang et al. (2017) well characterized the features of mixing layer

height in highly-sensitive areas of pollution in China ( 1–31 December 2015 for Beijing and the same period of 1–31 December 2015 for Guangzhou), and demonstrated the schematic diagram of 3-D model for low-level super-saturation layer and pollution mixing layer in the pollution hotspots in China, such as North China Plain (NCP), Yangtze River Delta (YRD), Pearl River Delta (PRD) and Si-Chuan Basin (SCB). Wang et al. (2022) also used this method to explore the PM<sub>2.5</sub> and O<sub>3</sub> superposition-composite pollution event during spring 2020 in Beijing, China, and the hourly evolution of MLH, O<sub>3</sub>, and PM<sub>2.5</sub> during the observation period were analyzed. The results can well depict the MLH diurnal cycle, which rises at daytime and decreases at night. In addition, Niu et al. (2017) has applied this method in Beijing, and the results showed that the pollution mixing layer can well present the change characteristics of haze pollution process. In this work, we further clarified the concept of MLH, and applied this method to investigate the impacts of MLH upon the change characteristics of ozone and fine particulate matter. The above discussion has been added in our revised manuscript (Page 7–8, line 152–190).

**Comment 9:** The % ratio of occurrence shown in Figure 2 should be mentioned in the methodology. How has it been calculated? The WS (Wind Speed) is barely mentioned, and I miss the Wind Direction. Although the authors discard advection, how can authors be certain that it is not always due to the same emission source or the same synoptic pattern?

**Answer:** Thank you for valuable comments. We have added the calculation method of the occurrence frequency (%) mentioned in Figure 2 in the methodology (Page 7, line 144–150). To better demonstrate the overall change characteristics of regional air pollution and meteorological conditions, the proportion of the number of cities at each air pollutant or methodology level was calculated based on the following equation:

$$\text{Occurrence frequency}_X^{\text{level}} = \frac{N_X^{\text{level}}}{\text{Total } N_X} \times 100\% \quad (4)$$

where X means the air pollutants or methodology factors,  $N_X^{\text{level}}$  represents the number of cities at each X level, Total  $N_X$  represents the total number of cities. For example, as for the MLH condition, the MLHs were classified into 8 levels, and this ratio indicates the proportion of the number of cities at each MLH level to the total number of cities. As can be seen in Figure 2, on June 5, 2021, the proportion of the number of cities at MLH>2100 m was around 85 %, and significantly higher than other MLH conditions; on June 10, 2021, the MLHs in all cities were lower than 1200 m, with the ratio at MLH<1200 as 100%.

According to your suggestions, we also presented the results of wind speed (WS) and wind direction (WD) to reveal the impact of wind on the variation trends of air pollutions in our revised manuscript (Figure R2– R6). As shown in Figure R2, during the whole campaign, the NCP was dominated by winds from northeast and south (45–225 °). Because more than 75 % WD were in the rang of 45–225 °, the WD was classified into 4 categories: 45–90, 90–135, 135–180, and 180–225 °. To further investigate the impact of wind on MDA8 O<sub>3</sub> and PM<sub>2.5</sub> concentrations, we also



demonstrated the statistics on the concentration distributions of MDA8 O<sub>3</sub>, PM<sub>2.5</sub> and its dominant components with the increase of MLH under different WS and WD conditions in Figure R4–R6. In general, WS could affect the diffusion of air pollutants. During the observation period, WS was mostly less than 3 m s<sup>-1</sup>, and the concentrations of air pollutants were comparatively higher at low wind speeds. As shown in Figure R3, at low MLH conditions (MLH<300 m), a northeasterly wind prevailed near the ground, and the WS was generally higher than other conditions. The concentration of MDA8 O<sub>3</sub> was low during this period. With the increase of MLH, the WD gradually changed from northeast (MLH=300–600 m) to southeast (MLH=600–900 m) and south (MLH=900–1200 m). The North China Plain (NCP) is surrounded to the west by the Taihang Mountains, to the north by the Yan Mountains, and to the east by the Bohai Sea (Figure 1). The southerly wind can transport the gaseous pollutant or O<sub>3</sub> from the southern part of the plain area to the northern part, and the Taihang mountains may block pollutant transport, leading to the accumulation of pollutants along the foot of the Taihang Mountains. It's noted that the concentration of MDA8 O<sub>3</sub> was higher when the plain dominated by southerlies (180–225 °) (Figure R4). When MLH higher than 2100 m, NCP was governed by northwest winds, which preferred the outward transport and diffusion of pollution, leading to the decrease of MDA8 O<sub>3</sub>. Comparing with O<sub>3</sub>, the impact of WD along with the increase of MLH seems different for PM<sub>2.5</sub> and its dominant components. When MLH in the range of 600–1200 m, the NCP was dominated by southeast or south winds. However, when southeast or south wind prevailed, the corresponding PM<sub>2.5</sub> and its dominant components concentrations were comparable or even lower than other WD situations (Figure R5–R6). This indicated that regional transport was not the dominant factor leading to the elevation of PM<sub>2.5</sub> and its aerosol species along with the evolution of mixing layer (MLH < 1200 m).

**Comment 10:** It would be interesting to mark some of the issues mentioned in the text in Figure 2 to assist the reader.

**Answer:** We have marked these three typical episodes: June 4–14 (Episode I), June 18–30 (Episode II), and July 2–11 (Episode III), 2021) in Figure 2 and Figure S1 in our revised manuscript.

**Comment 11:** In the sentence starting at line 153, it lacks clarification on "how." Although it is mentioned later.  
The sentence in 161 is not clear.

**Answer:** Thank you for valuable comments. The content in Section 3.1 has been reorganized and revised in our manuscript (Page 9–10, line 199–226):

“The summertime change characteristics of ground-level meteorological factors (MLH, RH, temperature, and WS), MDA8 O<sub>3</sub>, PM<sub>2.5</sub> and its major components in the NCP were demonstrated in Figure 2 and Figure S1. The primary atmospheric pollutant in the NCP during the summertime was O<sub>3</sub>, and the concentrations of MDA8

O<sub>3</sub> averaged over all sites in the NCP varied from 74.93 μg m<sup>-3</sup> to 219.28 μg m<sup>-3</sup>, with the mean value of 151.72 μg m<sup>-3</sup> (Table R3). The O<sub>3</sub> pollution lasted nearly the whole observation period, characterized by frequent and long-lasting pollution episodes. The PM<sub>2.5</sub> concentration was much lower comparing with ozone, with the mean, maximum, and minimum of the regional daily averaged PM<sub>2.5</sub> concentration as 25.62 μg m<sup>-3</sup>, 45.62 μg m<sup>-3</sup>, and 11.32 μg m<sup>-3</sup>, respectively. NO<sub>3</sub><sup>-</sup> was the prominent PM<sub>2.5</sub> component during summertime in the NCP, with the mean value of 7.76 μg m<sup>-3</sup>. According to the National Ambient Air Quality Standard of China (GB3095-2012), the daily PM<sub>2.5</sub> averages in “2+26” cities can meet the Level II national ambient air quality standard (75 μg m<sup>-3</sup>), while exceeding the level I standard of 35 μg m<sup>-3</sup>. As showed in Figure 2, regional PM<sub>2.5</sub> pollution processes corresponded well with the increasing processes of MDA8 O<sub>3</sub>. Here, we defined a O<sub>3</sub>-PM<sub>2.5</sub> co-polluted episode as a set of continuous days (longer than 4 days) with MDA8 O<sub>3</sub> and daily mean PM<sub>2.5</sub> in more than 10 % NCP cities exceeding 160 μg m<sup>-3</sup> and 35 μg m<sup>-3</sup>, respectively. According to this criterion, three typical O<sub>3</sub>-PM<sub>2.5</sub> co-polluted episodes were selected: June 4–14 (Episode I), June 18–29 (Episode II), and July 2–11 (Episode III), 2021, and these three typical O<sub>3</sub>-PM<sub>2.5</sub> co-polluted episodes have been pointed out in Figure 2 and Figure S1.

During these three typical episodes, the synchronous change characteristics of air pollutants and mixing layer meteorology were analyzed. In Episode I and II, when MLH higher than 2100 m, both MDA8 O<sub>3</sub> and PM<sub>2.5</sub> concentrations were low. Along with the reduction of MLH (from 1800–2100 m to 1200–1800 m), regional MDA8 O<sub>3</sub> and PM<sub>2.5</sub> concentration both gradually climbed up. When MLH fell in the range of 1200–1800 m, MDA8 O<sub>3</sub> concentration reached the maximum with about 80 % areas higher than 170 μg m<sup>-3</sup>. We found that there is a lag time between the concentration peak of MDA8 O<sub>3</sub> and that of PM<sub>2.5</sub> along with the reduction of MLH. With the further decrease of MLH, MDA8 O<sub>3</sub> turned to decline, while PM<sub>2.5</sub> kept stable or continued to increase when regional MLH in the range of 600–1200 m. In Episode III, the MLH in most cities was lower than 1200 m, and the regional MDA8 O<sub>3</sub> and PM<sub>2.5</sub> pollution conditions were lighter than other episodes, with 80 % PM<sub>2.5</sub> values lower than 35 μg m<sup>-3</sup>...”

In Section 3.2 and 3.3, we will comprehensively clarify the response of O<sub>3</sub>, PM<sub>2.5</sub> and its secondary components to different mixing layer meteorology factors along the evolution of mixing layer.

**Comment 12:** Line 186, when stating "low boundary layer height," adding a value in parentheses would be helpful.

**Answer:** This information “high O<sub>3</sub> concentrations corresponded to a low boundary layer height” was cited by Zhao et al. (2019). However, we have failed to find the original reference (NASTRO, 2000) through full-text electronic periodicals database, such as Science Direct and Springer, and the exact value of “low boundary layer height” can not be obtained. Thus, we deleted this sentence in our revised manuscript.



**Comment 13:** In the sentence at 191, it presents a dichotomy between vertical transport and photochemical formation. Can't both factors happen simultaneously?

**Answer:** Yes, these two processes can happen simultaneously. This relationship observed between MDA8 O<sub>3</sub> and MLH is very complex. Previous works have shown that higher height of mixing layer can lead to the mixing of near surface air with the O<sub>3</sub> rich air aloft, resulting in the observed enhancements in surface O<sub>3</sub> concentration (Reddy et al., 2012). Concurrently, the evolution of mixing layer were strongly associated with the change of other meteorological conditions, such as air temperature, RH and precipitation, which can also affect O<sub>3</sub> concentration (Haman et al., 2014). The combined effects of these processes ultimately determine whether ground-level O<sub>3</sub> increases or not along the evolution of mixing layer. The above discussion has been added in our revised manuscript (Page 12, line 255–261).

**Comment 14:** Line 202, authors could add wet deposition for ozone as another elimination pathway, not only as a slowdown of photochemistry.

**Answer:** Thank you for valuable comments. The effect of wet deposition for ozone has been added in our revised manuscript: “due to higher RH or rain fall, gaseous precursors and O<sub>3</sub> can be washed out from the atmosphere through wet deposition (Reddy et al., 2012)”. (Page 12, line 267–268)

**Comment 15:** The paragraph starting at line 211 and ending at 236 needs to be rephrased. These are not results.

**Answer:** Thank you for valuable comments. The paragraph starting at line 211 and ending at 236 has been rephrased in our revised manuscript (Page 14, lines 287–300).

**Comment 16:** In the statement on line 240, it is true that SO<sub>4</sub> and OC values reach their maximum at 900-1200m, but they are not significantly lower until 300-600m. How significant is this maximum? The same applies to NO<sub>3</sub> and NH<sub>4</sub> mentioned in line 242.

Line 249: "Changes in NH<sub>4</sub> were a consequence of the changes in SO<sub>4</sub> and NO<sub>3</sub>." It would be helpful to add the reason why; this sentence does not seem to be properly linked to the rest.

**Answer:** We have rephrased this paragraph in our revised manuscript (Page 15–16, line 308–318). The response of PM<sub>2.5</sub> concentrations to mixing layer structure was the net effect of the changes in PM<sub>2.5</sub> major chemical components. The purpose of this paragraph was to demonstrate the different change characteristics of these PM<sub>2.5</sub> components, and explore the intrinsic complexity mechanisms of PM<sub>2.5</sub> formation. These results showed that all the secondary components showed increasing trends when MLH changed from 0–300 m to 900–1200 m, with SO<sub>4</sub><sup>2-</sup> and OC showing the highest increment, followed by NO<sub>3</sub><sup>-</sup> and NH<sub>4</sub><sup>+</sup>. When MLH changed from 300–600

m to 900–1200 m, the increment was not significant for  $\text{NO}_3^-$  and  $\text{NH}_4^+$ . As  $\text{NH}_3$  was generally abundantly supplied in the NCP, the formation of  $\text{NH}_4^+$  was dominantly controlled by the reaction of ammonia with sulfate and nitrate aerosols, and the changes in  $\text{NH}_4^+$  were a consequence of the changes in  $\text{SO}_4^{2-}$  and  $\text{NO}_3^-$  (Chow et al., 2022). When  $\text{MLH} < 1200$  m, the mass fraction of  $\text{NO}_3^-$  was higher than  $\text{SO}_4^{2-}$  in  $\text{PM}_{2.5}$  (Figure S3), and the change characteristics of  $\text{NH}_4^+$  along with the evolution of mixing layer were consistent with that of  $\text{NO}_3^-$ .

**Comment 17:** In line with the previous discussion, line 261, "competing changes in  $\text{NO}_3^-$  and  $\text{SO}_4^{2-}$ ," does it mean that what decreases in one goes to the other?

I believe Figure 7 is mentioned before Figure 6.

In line 265, the phrase "the partitioning of semi-volatile nitrate is temperature-dependent" is not clear in relation to the previous information.

**Answer:** "Competing changes in  $\text{NO}_3^-$  and  $\text{SO}_4^{2-}$ " means the opposite effect of temperature on the change characteristics of  $\text{NO}_3^-$  and  $\text{SO}_4^{2-}$ . It's worthwhile noting that  $\text{SO}_4^{2-}$  concentration climbed up with temperature increase. Higher temperature could promote faster oxidation of  $\text{SO}_2$  to  $\text{SO}_4^{2-}$ , resulting in a significant increase in  $\text{SO}_4^{2-}$  concentration. Unlike  $\text{SO}_4^{2-}$ , which predominantly exists in the particle phase,  $\text{NO}_3^-$  could be either presented as nitric acid ( $\text{HNO}_3$ ) in the gas phase or as ammonium nitrate ( $\text{NH}_4\text{NO}_3$ ) in the particle phase (Chow et al., 2022). The temperature condition strongly influences the partitioning of nitrate between gas and particle phase. Higher temperature can prompt the partitioning of nitrate to  $\text{HNO}_3$ , thus nitrate tends to exit in the gas phase, resulting in a significant decrease in  $\text{NO}_3^-$  and  $\text{NH}_4^+$  concentrations. (Page 16, line 330–340)

**Comment 18:** The statement in line 270 "When MLH fell in the range..." should reference the figure. The same applies to what it is mentioned up to line 278.

Lines 293 to 296: "Under low MLH..." Where is all this observed?

The paragraph starting at line 306 does not reference the figures, making it hard to understand.

**Answer:** Thank you for valuable comments. We have referenced the figures in our revised manuscript (Page 16–18, lines 344, 350, 361 and 375).

**Comment 19:** In line 291, the WHO guideline is suddenly mentioned. Why is it brought up all of a sudden?

**Answer:** The purpose was to demonstrate that even though the  $\text{PM}_{2.5}$  concentration ( $31.34 \mu\text{g m}^{-3}$ ) under moderate MLH condition did not exceed the national air quality standard of  $\text{PM}_{2.5}$  (daily mean of  $35 \mu\text{g m}^{-3}$ ), the  $\text{PM}_{2.5}$  was still about two times higher than the WHO's  $\text{PM}_{2.5}$  guideline value (daily mean of  $15 \mu\text{g m}^{-3}$ , World Health Organization, 2021). This sentence does not seem to be properly linked to the

rest. Considering the readability of this paragraph, we have deleted this sentence in our revised manuscript.

**Comment 20:** Line 302: "The upward trend..." is not clear.

**Answer:** We have modified the description in our revised manuscript: "The increase of PM<sub>2.5</sub> and its major chemical components under medium MLH condition was not only associated with the weaker particle removal process by precipitation, but also related to the enhancement of secondary aerosol formation due to appropriate chemical reaction environment".(Page 17, line 369–371)

**Comment 21:** Concentrations of daily averages are also analyzed, but in this kind of episodes, the relevance of hourly concentrations can be crucial. This should also be made clear somewhere, although the analysis of the episodes is only carried out to highlight certain results.

In section 3.4, why is only one episode analyzed? If analyzing a single episode, it would be convenient to include a map with the synoptic evolution of those days.

**Answer:** In this work, we find a typical PM<sub>2.5</sub>-O<sub>3</sub> coordinated event (Episode II: June 18–29, 2021) during the observation period to comprehensively present the relationship between the mixing layer meteorology and air pollutants. Figure R7 and R8 showed the temporal-spatial distribution of air pollutants and meteorological factors during June 18–29, 2021. On June 18–20, MLH gradually increased from 600–1200 m to 1500–3000 m in the southern and eastern part of the NCP, PM<sub>2.5</sub> and MDA8 O<sub>3</sub> concentrations concurrently increased and showed similar spatial distributions. The wind speed dropped significantly on 20 June, and the value was lower than 1 m s<sup>-1</sup> in most cities. On 21–23 June, MLH started to decrease from 1500–3000 m to 1200–1800 m, PM<sub>2.5</sub> and MDA8 O<sub>3</sub> concentrations further increased, and the areas of high PM<sub>2.5</sub> concentrations coincided well with those of MDA8 O<sub>3</sub> concentrations. During 24–25 June, MLH continued to decrease, with some values even lower than 300 m. The MLH for the areas with high MDA8 O<sub>3</sub> was in the range of 900–1500 m. Interestingly, the synchronized spatial change characteristics of PM<sub>2.5</sub> and MDA8 O<sub>3</sub> were consistent when MLH in the range of 900–1200 m, while inconsistent when MLH lower than 600 m. Significant rise of PM<sub>2.5</sub> concentration was observed in some cities with MLH lower than 300 m. It's noted that the dominant chemical composition of PM<sub>2.5</sub> in these areas was NO<sub>3</sub><sup>-</sup>. On 28 June, the rise in MLH was observed in the central and the southern part in the NCP, and a surge of MDA8 O<sub>3</sub> and PM<sub>2.5</sub> concentrations both occurred, with 160–220 μg m<sup>-3</sup> and 40–50 μg m<sup>-3</sup> respectively. In general, most cities were dominated by weak winds from the east and southeast, which favored the formation of secondary pollutants from the gaseous precursors transported from the southeast part and promoted the accumulation of air pollutants.

To better understand this PM<sub>2.5</sub>-O<sub>3</sub> co-polluted event, here we classified the observations during this typical event into four categories: O<sub>3</sub> polluted days (O<sub>3</sub>PD);

MDA8  $O_3$  concentration  $> 160 \mu\text{g m}^{-3}$  and  $\text{PM}_{2.5} < 35 \mu\text{g m}^{-3}$ ),  $\text{PM}_{2.5}$  polluted days ( $\text{PM}_{2.5}\text{PD}$ ; MDA8  $O_3$  concentration  $< 160 \mu\text{g m}^{-3}$  and  $\text{PM}_{2.5} > 35 \mu\text{g m}^{-3}$ ),  $O_3$ - $\text{PM}_{2.5}$  co-polluted days ( $O_3$ - $\text{PM}_{2.5}\text{CPD}$ ; MDA8  $O_3$  concentration  $> 160 \mu\text{g m}^{-3}$  and  $\text{PM}_{2.5} > 35 \mu\text{g m}^{-3}$ ), and non-polluted days (NPD; MDA8  $O_3 < 80 \mu\text{g m}^{-3}$  and  $\text{PM}_{2.5} < 35 \mu\text{g m}^{-3}$ ). Figure R9 showed the meteorological and chemical characteristic of  $O_3$ - $\text{PM}_{2.5}\text{CPD}$ ,  $O_3\text{PD}$ ,  $\text{PM}_{2.5}\text{PD}$ , and NPD. The results indicated that the values of MLH on  $O_3$ - $\text{PM}_{2.5}\text{CPD}$  were between those on  $O_3\text{PD}$  and  $\text{PM}_{2.5}\text{PD}$  at around 900 m. On  $O_3$ - $\text{PM}_{2.5}\text{CPD}$ , the oxidation ratio of sulfate (SOR, the molar ratio of sulfate to the sum of sulfate and  $\text{SO}_2$ ) and oxidation ratio of nitrate (NOR, the molar ratio of nitrate to the sum of nitrate and  $\text{NO}_2$ ) were the highest, with the values of 0.44 and 0.33, respectively, which indicated the strong secondary formation of  $\text{SO}_4^{2-}$  and  $\text{NO}_3^-$  promoted by high  $O_3$  concentration. The  $\text{PM}_{2.5}\text{PD}$  occurred when MLH lower than 650 m, and the percentage of  $\text{NO}_3^-$  was the highest on  $\text{PM}_{2.5}\text{PD}$ . The rise of  $\text{PM}_{2.5}$  in some cities under low MLH conditions may be attributed to three mechanisms. The first one is the accumulation effect due to unfavorable diffusion condition when MLH decreased. Second, these cities got little rain, and the effect of wet deposition was weak. In addition, the corresponding low T and high RH can stimulate the formation of  $\text{NO}_3^-$  from gaseous state ( $\text{HNO}_3$ ). On  $O_3\text{PD}$ , the MLH was at around 1300 m, and the NOR turned to decrease, demonstrating a more significant role of partitioning process between gas and aerosol than the atmospheric oxidation process under this stage. On NPD, the MLH was the highest, with the value of about 2400 m, and the  $\text{PM}_{2.5}$  chemical composition was obviously dominated by OM.

To explore the relevance of hourly  $O_3$ ,  $\text{PM}_{2.5}$ , its components and MLH, we have taken PuY and HeZ as examples. Figure R10 plotted the day-to-day variations along with the diurnal variations of  $O_3$ ,  $\text{PM}_{2.5}$ , its components and MLH in PuY and HeZ during Episode II (June 18–29, 2021). The results showed that there were large diurnal as well as day-to-day variability in the  $O_3$  and  $\text{PM}_{2.5}$  levels. The diurnal variations of MLH were clearly visible (Figure R11), with the rise in MLH during the daytime and the decrease in MLH at night. The concentration of  $\text{PM}_{2.5}$  increased with the decrease of MLH at night, but the concentration of  $O_3$  increased with the rise of MLH at daytime. Interestingly, we observed noontime soar of  $\text{SO}_4^{2-}$  and OC concentrations in PuY, and the values of SOR kept stable or even increased at noon. Besides, it's noted that daily  $O_3$  and  $\text{PM}_{2.5}$  both gradually accumulated with the increase of MLH during June 18–21 and 26–28, which can be attributed to the  $O_3$  and  $\text{PM}_{2.5}$  superposition composite effects. The decrease in  $\text{PM}_{2.5}$  at daytime with the rise of MLH can be partly offset by an increment in secondary pollutants formation derived from  $O_3$  growth. Then with the decrease of MLH at night, the concentration of the original existing  $\text{PM}_{2.5}$  increased due to unfavorable diffusion. In general, the conclusions in this work was only suitable to the day-to-day relationship between air pollutants and MLH. The hourly relationships were much more complicated and need more further analysis. According to your valuable comments, we will focus on the hourly relationship in the NCP in our follow-up studies. The above discussion has been added in our revised manuscript (Page 19–24, line 393–476).

**Comment 22:** When presenting the soundings, the interpretation of the data and the significance of the extinction coefficient should be explained. Why were soundings taken in those cities?

**Answer:** According to the valuable suggestion of Reviewer #2, the ozone radar has great shortcomings in the summer when there are clouds and high humidity, and the data may send wrong message and misled readers. Therefore, we deleted the soundings part in our revised manuscript.

**Comment 23:** In Figure 8, acronyms like OS and SO, do they mean the same thing?

**Answer:** No, the acronyms of OS and SO were different. The dominant PM<sub>2.5</sub> chemical component type was identified as follows: if the mass fraction of the maximum component was 1.2 times higher than that of the secondary one, the former was considered as the dominant factor, otherwise both dominated PM<sub>2.5</sub> formation. For the chemical component types of OS and SO, OM and SO<sub>4</sub><sup>2-</sup> both dominated PM<sub>2.5</sub> formation, however the maximum PM<sub>2.5</sub> component was different. For acronyms OS, OM was the maximum component, and SO<sub>4</sub><sup>2-</sup> was the secondary one; while as for SO, it is the other way around.

**Comment 24:** Linguistic issues in English to review: Expressions erroneously translated that result in: 'To the first order', 'as the MLH fixed', 'serious' (subjective), 'atmospheric dissipation (or dispersion?) potential', 'obvious (subjective)', 'the above analysis', 'MLH prefers'."

**Answer:** Thanks for your valuable comments. These mistakes have been corrected in our revised manuscript. (Line 61, 264, 332, 349, 363, 394, and 514)

## References

- Chow, W. S., Liao, K., Huang, X. H. H., Leung, K. F., Lau, A. K. H., and Yu, J. Z.: Measurement report: The 10-year trend of PM<sub>2.5</sub> major components and source tracers from 2008 to 2017 in an urban site of Hong Kong, China, *Atmos. Chem. Phys.*, 22, 11557-11577, 10.5194/acp-22-11557-2022, 2022.
- Chu, B., Ma, Q., Liu, J., Ma, J., Zhang, P., Chen, T., Feng, Q., Wang, C., Yang, N., Ma, H., Ma, J., Russell, A. G., and He, H.: Air Pollutant Correlations in China: Secondary Air Pollutant Responses to NO<sub>x</sub> and SO<sub>2</sub> Control, *Environ. Sci. Technol. Lett.*, 7, 695-700, 10.1021/acs.estlett.0c00403, 2020.
- Dai, H., Liao, H., Li, K., Yue, X., Yang, Y., Zhu, J., Jin, J., Li, B., and Jiang, X.: Composited analyses of the chemical and physical characteristics of co-polluted days by ozone and PM<sub>2.5</sub> over 2013–2020 in the Beijing–Tianjin–Hebei region, *Atmos. Chem. Phys.*, 23, 23-39, 10.5194/acp-23-23-2023, 2023.
- Haman, C. L., Couzo, E., Flynn, J. H., Vizuete, W., Heffron, B., and Lefer, B. L.: Relationship between boundary layer heights and growth rates with ground-level ozone in Houston, Texas, *J. Geophys. Res. Atmos.*, 119, 6230-6245, 10.1002/2013jd020473, 2014.
- Haugen, D. A., Kaimal, J. C., Bradley, E. F.: An experimental study of Reynolds stress and heat flux in the atmospheric surface layer, *Q. J. Roy. Meteor. Soc.*, 97, 168-180, 1971.
- Li, M., Zhang, Z., Yao, Q., Wang, T., Xie, M., Li, S., Zhuang, B., and Han, Y.: Nonlinear responses of particulate nitrate to NO<sub>x</sub> emission controls in the megalopolises of China, *Atmos. Chem. Phys.*, 21, 15135-15152, 10.5194/acp-21-15135-2021, 2021.
- NASTRO (The North American Research Strategy for Tropospheric Ozone): An assessment of tropospheric ozone pollution: a North American perspective, 2000.
- Niu, T., Wang, J., Yang, Y., Wang, Y., and Chen, C.: A study on parameterization of the Beijing winter heavy haze events associated with height of pollution mixing layer, *Adv. Meteorol.*, 2017, 1-11, 10.1155/2017/8971236, 2017.
- Reddy, K. K., Naja, M., Ojha, N., Mahesh, P., and Lal, S.: Influences of the boundary layer evolution on surface ozone variations at a tropical rural site in India, *J. Earth Syst. Sci.*, 121, 911-922, 10.1007/s12040-012-0200-z, 2012.
- Wang, J., Yang, Y.: *Modern weather engineering*. Meteorological Press, Beijing, 334–339, 2000.
- Wang, J., Bian, L., Xiao, C.: Dynamics of Ekman boundary layer over the antarctic plateau in summer, *Chinese Sci. Bull.*, 59, 999–1005, 2014.
- Wang, J., Yang, Y., Zhang, X., Liu, H., Che, H., Shen, X., and Wang, Y.: On the influence of atmospheric super-saturation layer on China's heavy haze-fog events, *Atmos. Environ.*, 171, 261-271, 10.1016/j.atmosenv.2017.10.034, 2017.
- Wang, J., Yang, Y., Jiang, X., Wang, D., Zhong, J., and Wang, Y.: Observational study of the PM<sub>2.5</sub> and O<sub>3</sub> superposition-composite pollution event during spring 2020 in Beijing associated with the water vapor conveyor belt in the northern hemisphere, *Atmos. Environ.*, 272, 10.1016/j.atmosenv.2022.118966, 2022.
- Wu, X., Xin, J., Zhang, W., Gao, W., Ma, Y., Ma, Y., Wen, T., Liu, Z., Hu, B., Wang,



- Y., and Wang, L.: Variation characteristics of air combined pollution in Beijing City, *Atmos. Res.*, 274, 10.1016/j.atmosres.2022.106197, 2022.
- Zhao, W., Tang, G., Yu, H., Yang, Y., Wang, Y., Wang, L., An, J., Gao, W., Hu, B., Cheng, M., An, X., Li, X., and Wang, Y.: Evolution of boundary layer ozone in Shijiazhuang, a suburban site on the North China Plain, *J Environ Sci (China)*, 83, 152-160, 10.1016/j.jes.2019.02.016, 2019.
- Zhang, G., Bian, L., Wang, J., Yang, Y., Yao, W., Xu, X.: The boundary layer characteristics in the heavy fog formation process over Beijing and its adjacent areas, *Sci. China Earth Sci.*, 48, 88–101, 2005.

**Table R1.** List of observation stations and locations.

| No. | Site         | Abbreviation | Station                                               | longitude<br>(°E) | latitude<br>(°N) |
|-----|--------------|--------------|-------------------------------------------------------|-------------------|------------------|
| 1   | BeiJing      | BeiJ         | China National<br>Environmental Monitoring<br>Centre  | 116.41            | 40.04            |
| 2   | Tianjin      | TianJ        | Zhongshan North Road<br>Station                       | 117.21            | 39.17            |
| 3   | Shijiazhuang | SJZ          | Northwest Shuiyuan Station                            | 114.49            | 38.13            |
| 4   | Langfang     | LangF        | Langfang Hebei University<br>of Technology Station    | 116.70            | 39.55            |
| 5   | Baoding      | BaoD         | Yangguang North Street<br>Station                     | 115.48            | 38.93            |
| 6   | Tangshan     | TangS        | Xiaoshan Station                                      | 118.19            | 39.62            |
| 7   | Handan       | HanD         | Guangming South Street<br>Station                     | 114.50            | 36.57            |
| 8   | Hengshui     | HengS        | Hengshui Ecology and<br>Environment Bureau<br>Station | 115.68            | 37.73            |
| 9   | Xingtai      | XingT        | Quanbei Street Station                                | 114.53            | 37.09            |
| 10  | Cangzhou     | CangZ        | Cangzhou Technical<br>College Station                 | 116.82            | 38.28            |
| 11  | Taiyuan      | TaiY         | Taiyuan Jinyuan Station                               | 112.48            | 37.71            |
| 12  | Yangquan     | YangQ        | Nanzhuang Road Station                                | 113.59            | 37.85            |
| 13  | Changzhi     | ChangZ       | Changzhi Ecology and<br>Environment Bureau<br>Station | 113.11            | 36.20            |
| 14  | Jincheng     | JinC         | Jincheng Ecology and<br>Environment Bureau<br>Station | 112.86            | 35.49            |
| 15  | Jinan        | JiNan        | Jinan Environmental<br>Monitoring Station             | 117.06            | 36.66            |
| 16  | Zibo         | ZiB          | Beijing Road station                                  | 117.91            | 36.84            |
| 17  | Jining       | JiNing       | Jinyu Road Station                                    | 116.63            | 35.43            |
| 18  | Dezhou       | DeZ          | Baima Lake Station                                    | 115.83            | 36.95            |
| 19  | Liaocheng    | LiaoC        | Liaocheng monitoring<br>center Station                | 115.98            | 36.50            |
| 20  | Binzhou      | BinZ         | Binzhou Ecology and<br>Environment Bureau<br>Station  | 118.01            | 37.38            |
| 21  | Heze         | HeZ          | Heze Quality Supervision                              | 115.53            | 35.21            |

| Bureau Station |           |        |                                                 |        |       |
|----------------|-----------|--------|-------------------------------------------------|--------|-------|
| 22             | Zhengzhou | ZhengZ | Zhengzhou Forty-seven Middle School Station     | 113.74 | 34.77 |
| 23             | Kaifeng   | KaiF   | Jinming West Street Station                     | 114.30 | 34.80 |
| 24             | Anyang    | AnY    | Anyang Ecology and Environment Bureau Station   | 114.40 | 36.09 |
| 25             | Hebi      | HeB    | Hebi Ecology and Environment Bureau Station     | 114.29 | 35.72 |
| 26             | Xinxiang  | XinX   | Xinxiang Ecology and Environment Bureau Station | 113.92 | 35.30 |
| 27             | Jiaozuo   | JiaoZ  | Fengshou Middle Road Station                    | 113.28 | 35.21 |
| 28             | Puyang    | PuY    | Jinti Road Station                              | 115.04 | 35.76 |

**Table R2.** List of observation species and metrics.

| Species                                                                                   | Unit               | Temporal resolution | Metrics                   |
|-------------------------------------------------------------------------------------------|--------------------|---------------------|---------------------------|
| Gaseous pollutants                                                                        |                    |                     |                           |
| O <sub>3</sub>                                                                            | μg m <sup>-3</sup> | 1 h                 | Maximum daily 8 h average |
| SO <sub>2</sub>                                                                           | μg m <sup>-3</sup> | 1 h                 | Daily average             |
| NO <sub>2</sub>                                                                           | μg m <sup>-3</sup> | 1 h                 | Daily average             |
| PM <sub>2.5</sub> and its major components                                                |                    |                     |                           |
| PM <sub>2.5</sub>                                                                         | μg m <sup>-3</sup> | 1 h                 | Daily average             |
| SO <sub>4</sub> <sup>2-</sup> /NO <sub>3</sub> <sup>-</sup> /NH <sub>4</sub> <sup>+</sup> | μg m <sup>-3</sup> | 1 h                 | Daily average             |
| OC                                                                                        | μg m <sup>-3</sup> | 1 h                 | Daily average             |
| Meteorological variables                                                                  |                    |                     |                           |
| Temperature (T)                                                                           | °C                 | 1 h                 | Daily average             |
| Relative Humidity (RH)                                                                    | %                  | 1 h                 | Daily average             |
| Wind speed (WS)                                                                           | m s <sup>-1</sup>  | 1 h                 | Daily average             |
| Wind direction (WD)                                                                       | °                  | 1 h                 | Daily average             |
| 24-h precipitation                                                                        | mm                 | 24 h                | 24-h accumulated          |

**Table R3.** General information on O<sub>3</sub>–PM<sub>2.5</sub> co-polluted episodes from June 1 to July 31, 2021.

|                                                                     | Episode I |        |         | Episode II |        |         | Episode III |        |        | Summer |        |         |
|---------------------------------------------------------------------|-----------|--------|---------|------------|--------|---------|-------------|--------|--------|--------|--------|---------|
|                                                                     | Ave.      | Min    | Max     | Ave.       | Min    | Max     | Ave.        | Min    | Max    | Ave.   | Min    | Max     |
| Gaseous pollutants ( $\mu\text{g m}^{-3}$ )                         |           |        |         |            |        |         |             |        |        |        |        |         |
| MDA8 O <sub>3</sub>                                                 | 170.80    | 85.62  | 219.28  | 180.65     | 142.10 | 204.15  | 168.70      | 111.79 | 199.39 | 151.72 | 74.94  | 219.28  |
| SO <sub>2</sub>                                                     | 10.01     | 6.48   | 14.44   | 9.09       | 6.11   | 12.48   | 6.75        | 5.72   | 8.00   | 7.59   | 4.79   | 14.44   |
| NO <sub>2</sub>                                                     | 24.61     | 16.26  | 31.81   | 22.89      | 14.11  | 32.15   | 17.66       | 13.12  | 21.00  | 19.31  | 10.90  | 32.15   |
| PM <sub>2.5</sub> and its major components ( $\mu\text{g m}^{-3}$ ) |           |        |         |            |        |         |             |        |        |        |        |         |
| PM <sub>2.5</sub>                                                   | 30.55     | 15.74  | 42.67   | 28.33      | 17.22  | 42.52   | 25.05       | 20.84  | 31.75  | 25.62  | 11.32  | 45.62   |
| NO <sub>3</sub> <sup>-</sup>                                        | 8.74      | 2.16   | 16.44   | 8.29       | 2.85   | 18.00   | 7.67        | 5.87   | 13.44  | 7.76   | 2.16   | 18.24   |
| SO <sub>4</sub> <sup>2-</sup>                                       | 7.22      | 2.81   | 10.25   | 7.32       | 4.02   | 12.15   | 7.12        | 5.48   | 8.92   | 7.04   | 2.81   | 12.15   |
| NH <sub>4</sub> <sup>+</sup>                                        | 5.51      | 1.42   | 9.34    | 5.52       | 2.27   | 9.29    | 5.38        | 4.46   | 8.21   | 5.30   | 1.42   | 9.88    |
| OC                                                                  | 5.11      | 2.74   | 6.60    | 4.71       | 3.25   | 6.75    | 4.11        | 2.90   | 5.30   | 4.32   | 2.69   | 6.75    |
| Meteorological variables                                            |           |        |         |            |        |         |             |        |        |        |        |         |
| MLH (m)                                                             | 1342.73   | 305.93 | 2423.42 | 1190.36    | 626.51 | 2127.31 | 740.86      | 460.91 | 950.10 | 855.99 | 305.93 | 2423.42 |
| T (°C)                                                              | 26.24     | 23.86  | 28.91   | 27.41      | 25.53  | 28.76   | 27.58       | 24.85  | 30.14  | 26.69  | 22.48  | 30.14   |
| RH (%)                                                              | 57.01     | 32.78  | 90.54   | 56.90      | 37.04  | 70.60   | 71.45       | 64.64  | 80.38  | 68.70  | 32.78  | 90.54   |

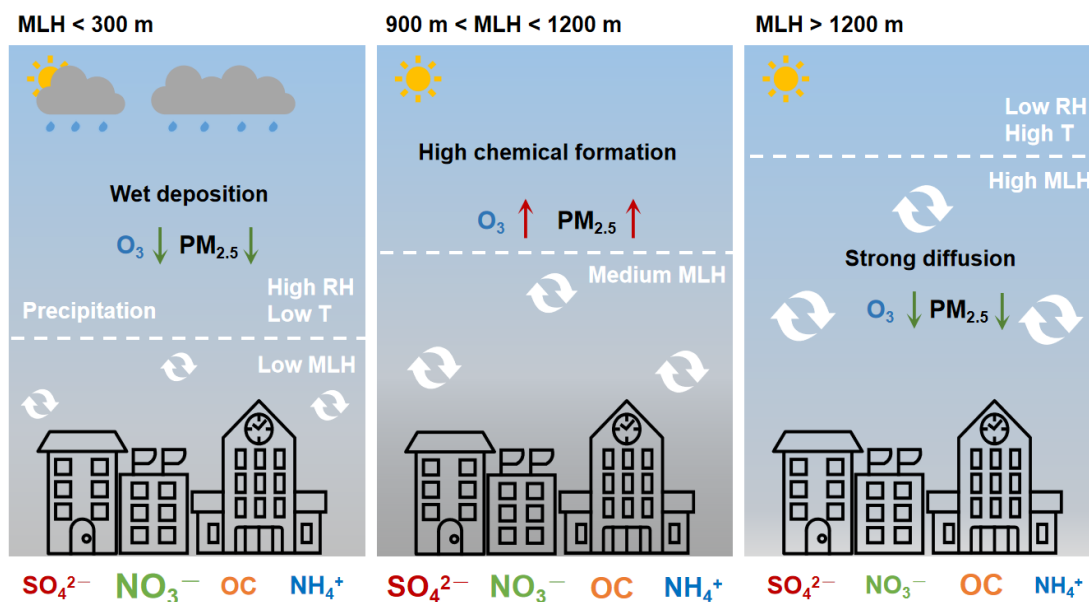

Figure R1. The graphical abstract.

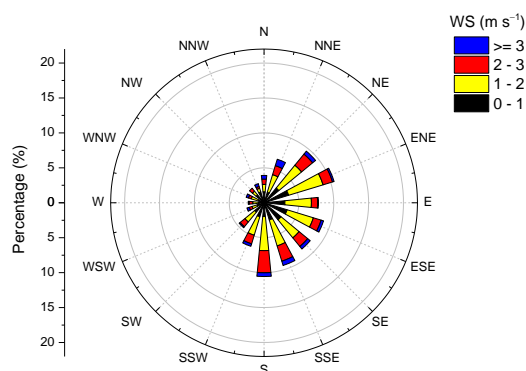

Figure R2 The overall WS and WD condition during the observation campaign. S: south; N: north; E: east; W: west.

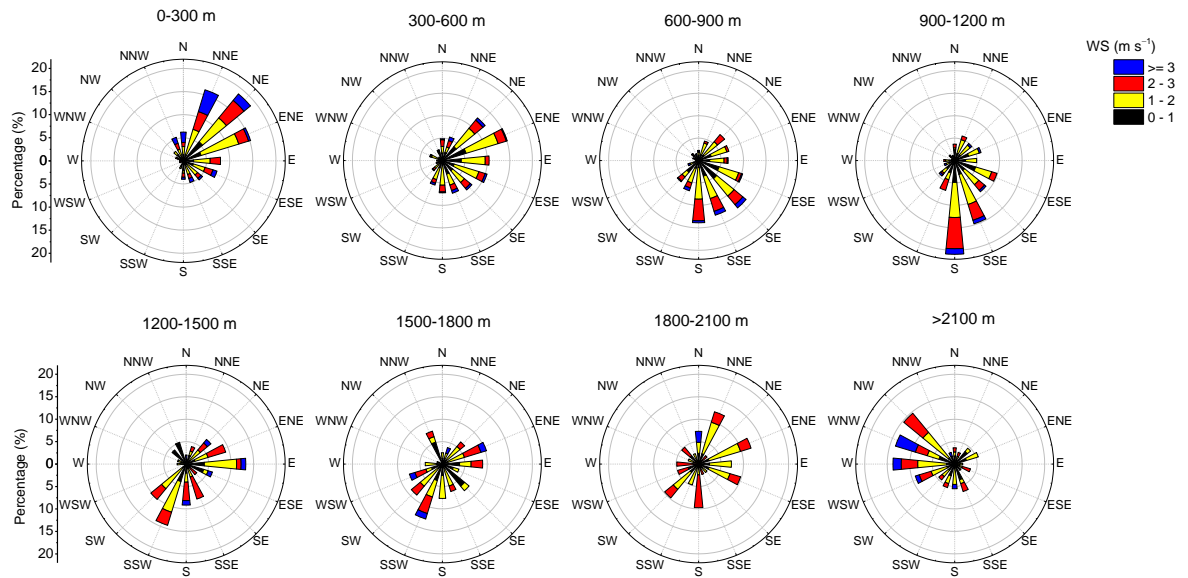

**Figure R3** The change characteristics of WS and WD under different MLH levels. S: south; N: north; E: east; W: west.



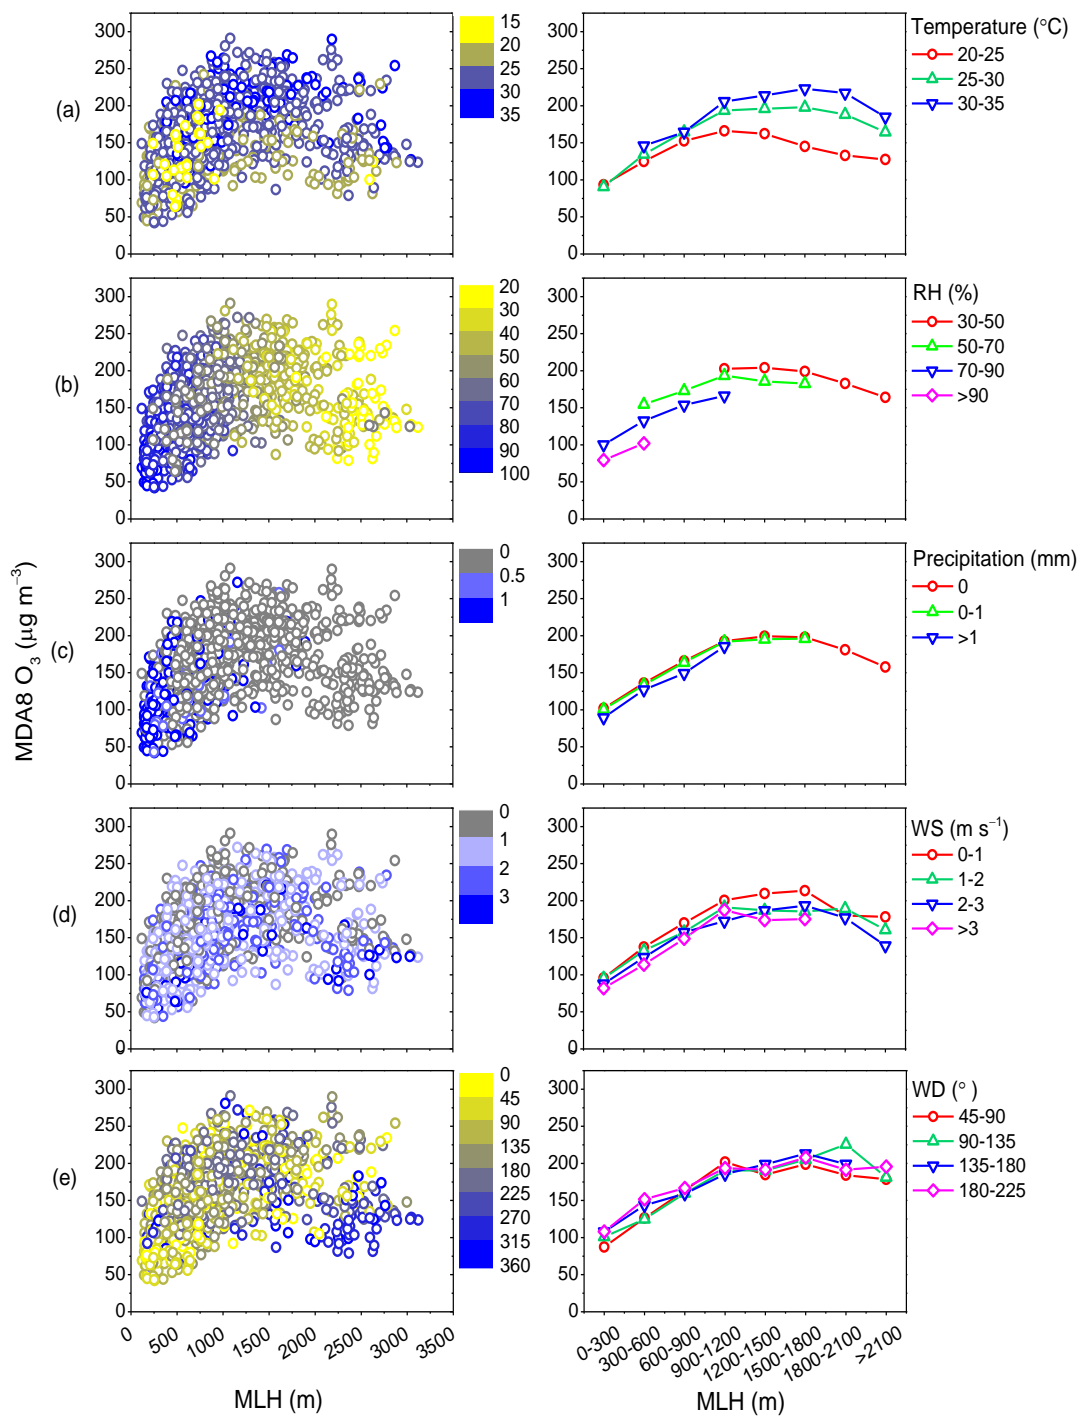

**Figure R4.** The distribution characteristics of the MDA8 O<sub>3</sub> concentrations with the evolution of MLH under different (a) temperature, (b) RH, (c) precipitation, (d) WS, and (e) WD conditions.

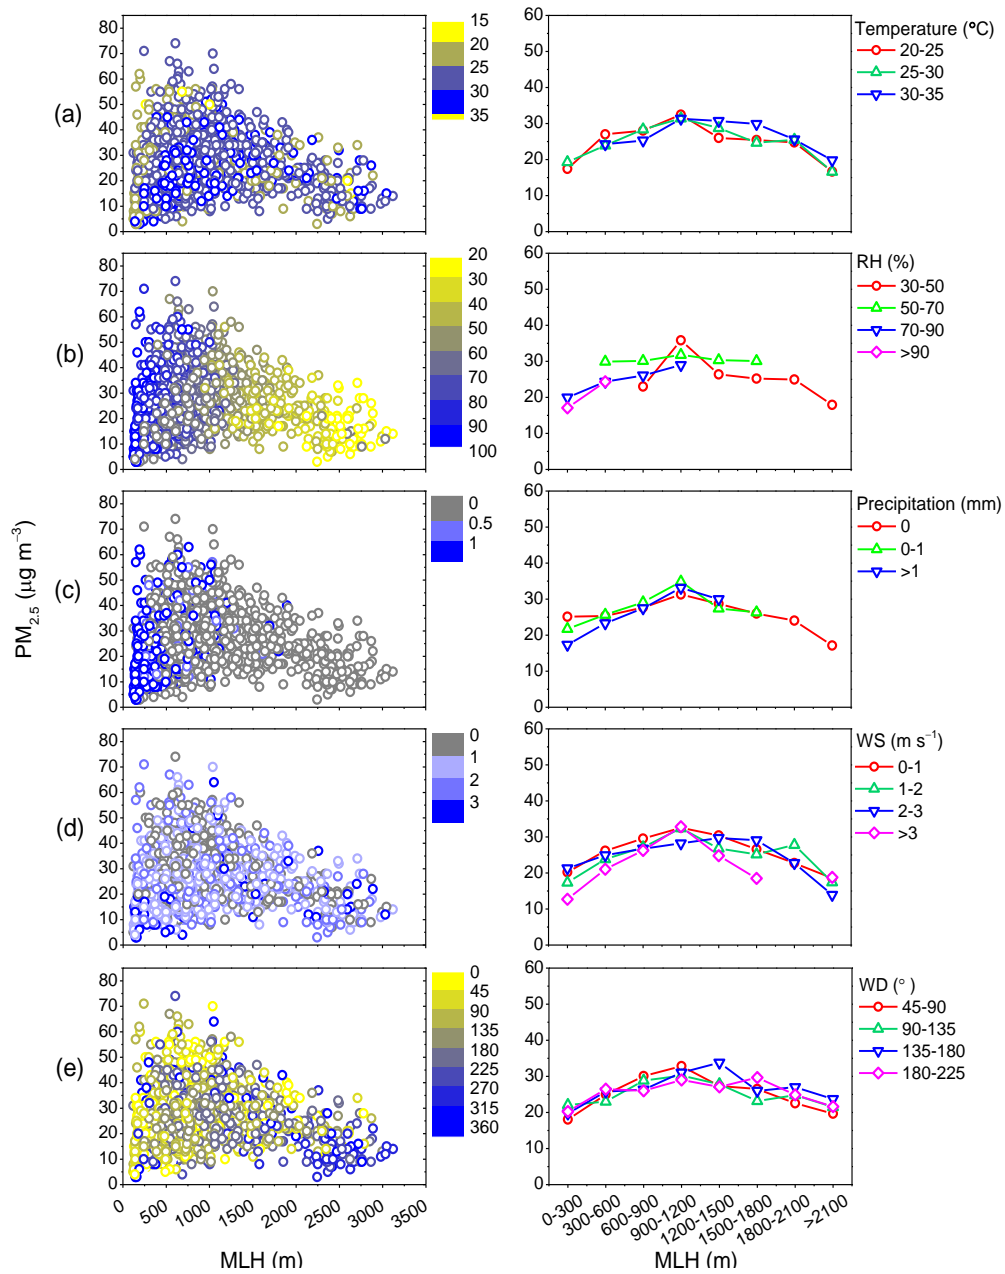

**Figure R5.** The distribution characteristics of the  $PM_{2.5}$  concentrations with the evolution of MLH under different (a) temperature, (b) RH, (c) precipitation, (d) WS, and (e) WD conditions.

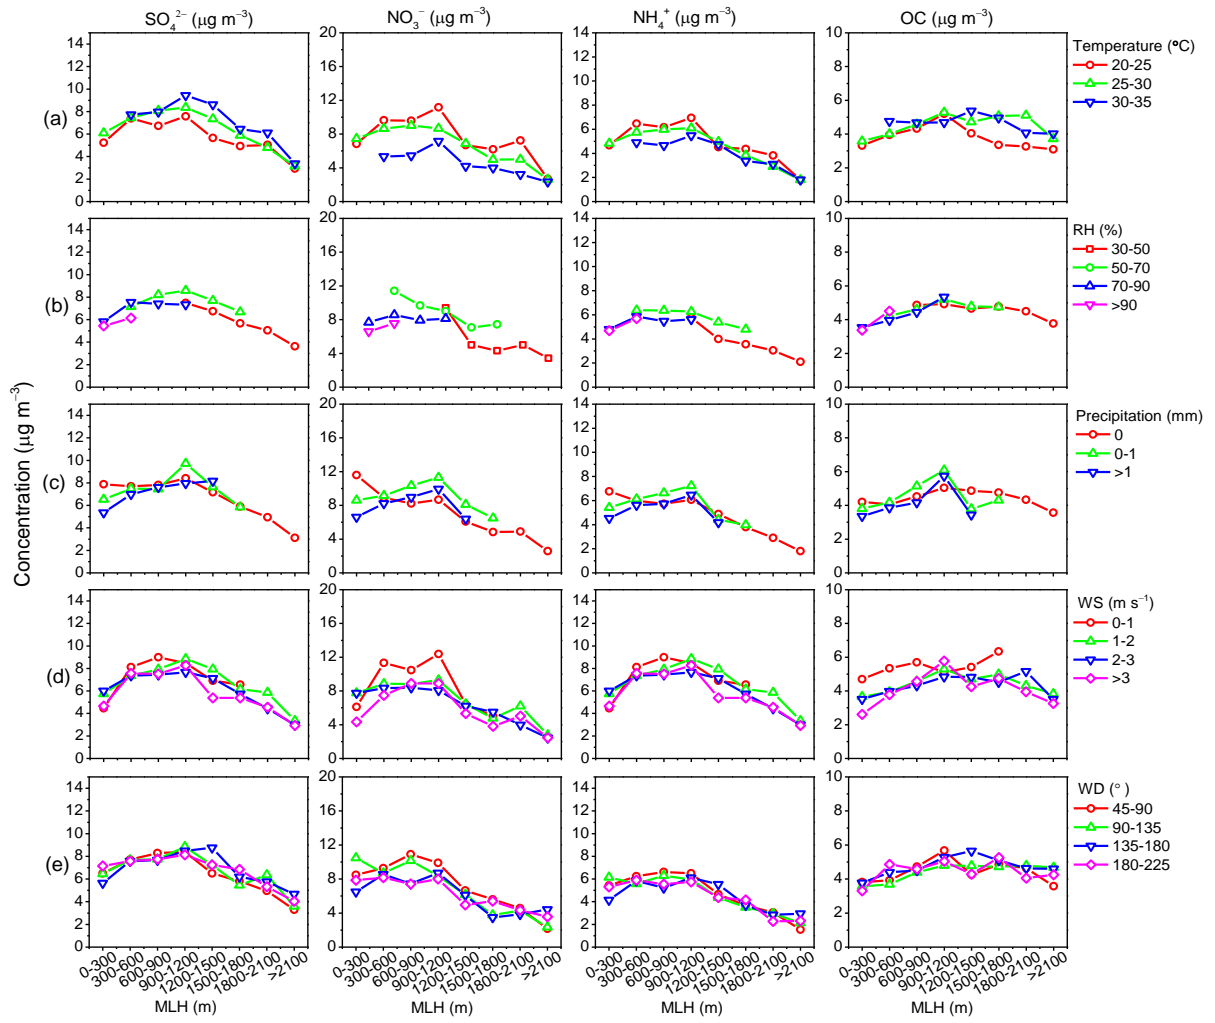

**Figure R6.** The distribution characteristics of  $\text{NO}_3^-$ ,  $\text{SO}_4^{2-}$ ,  $\text{NH}_4^+$ , and OC concentrations with the evolution of MLH under different (a) temperature, (b) RH, (c) precipitation, (d) WS, and (e) WD conditions.

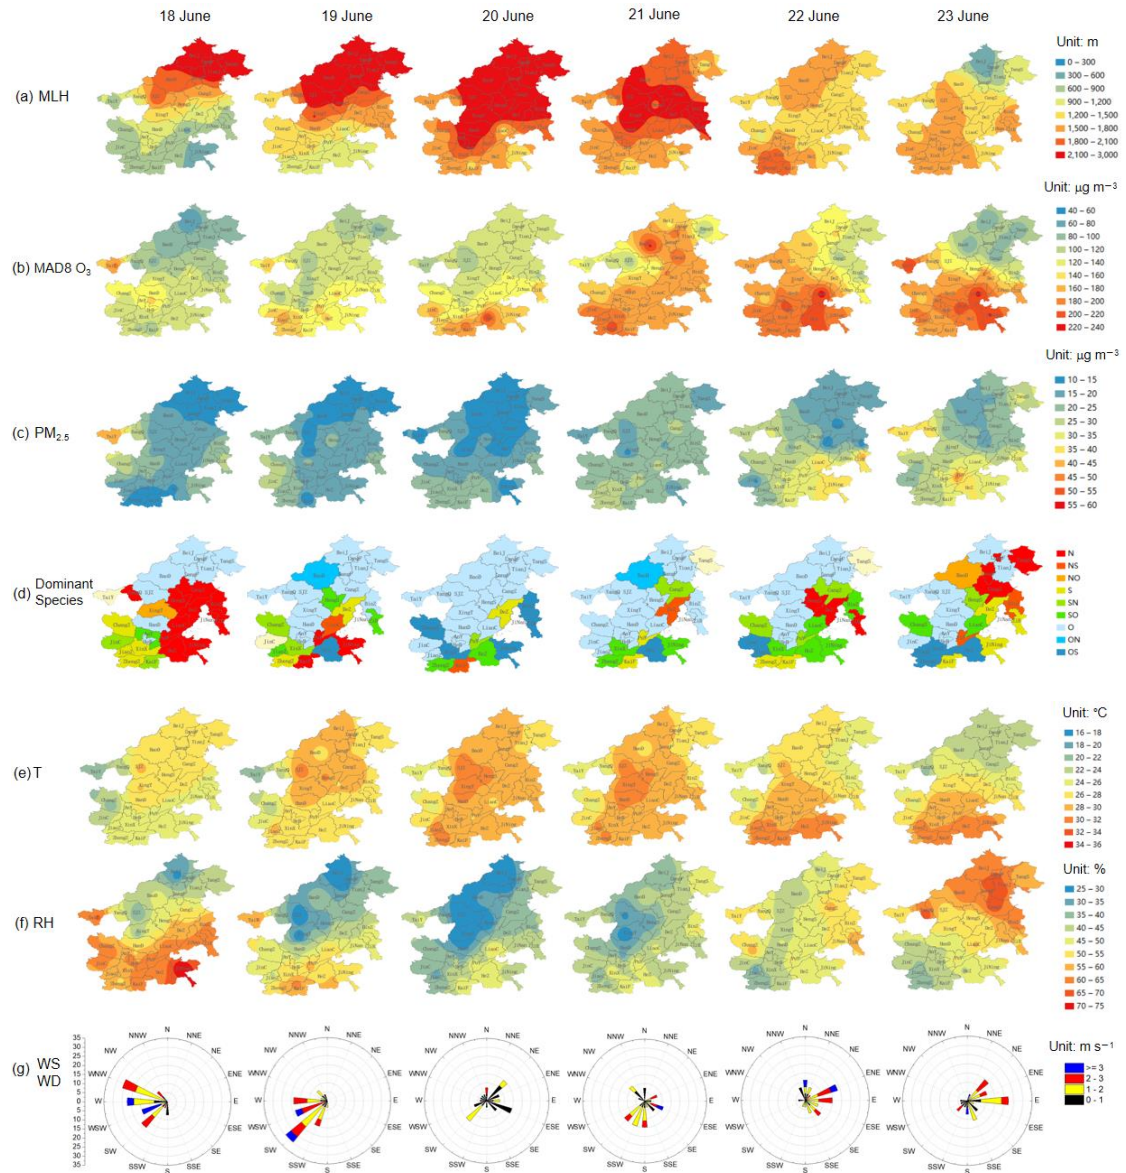

**Figure R7.** The spatial distribution of (a) MLH, (b) MDA8 O<sub>3</sub>, (c) PM<sub>2.5</sub>, (d) the dominant PM<sub>2.5</sub> chemical component (N: NO<sub>3</sub><sup>-</sup> dominant, NS: NO<sub>3</sub><sup>-</sup> and SO<sub>4</sub><sup>2-</sup> dominant, NO: NO<sub>3</sub><sup>-</sup> and OM dominant, S: SO<sub>4</sub><sup>2-</sup> dominant, SN: SO<sub>4</sub><sup>2-</sup> and NO<sub>3</sub><sup>-</sup> dominant, SO: SO<sub>4</sub><sup>2-</sup> and OM dominant, O: OM dominant, ON: OM and NO<sub>3</sub><sup>-</sup> dominant, OS: OM and SO<sub>4</sub><sup>2-</sup> dominant), (e) T, and (f) RH, (g) the overall change characteristics of WS and WD in the NCP from June 18 to 23, 2021.



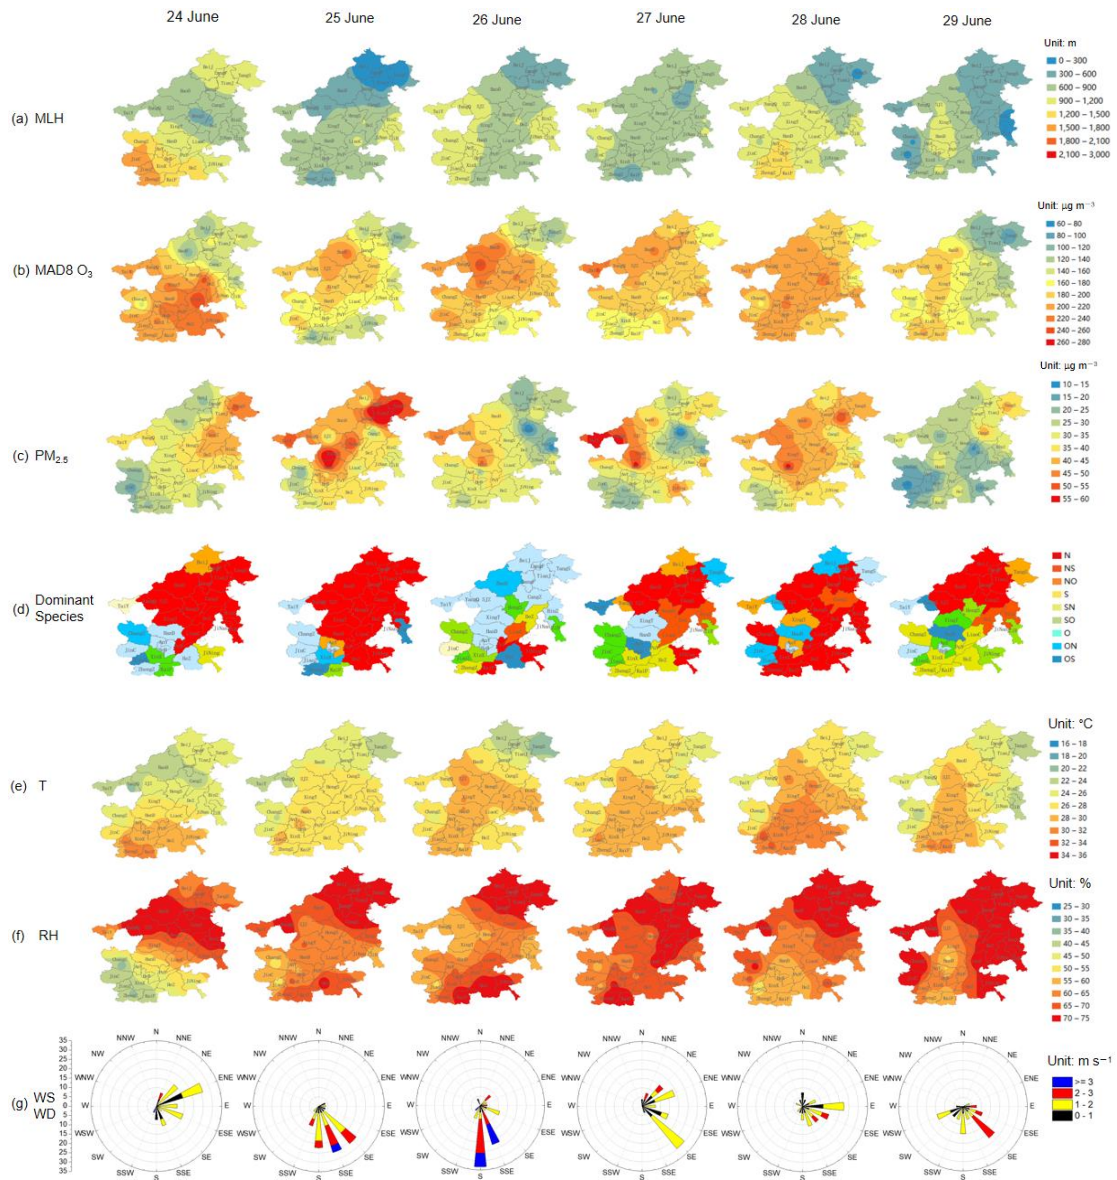

**Figure R8.** The spatial distribution of (a) MLH, (b) MDA8 O<sub>3</sub>, (c) PM<sub>2.5</sub>, (d) the dominant PM<sub>2.5</sub> chemical component (N: NO<sub>3</sub><sup>-</sup> dominant, NS: NO<sub>3</sub><sup>-</sup> and SO<sub>4</sub><sup>2-</sup> dominant, NO: NO<sub>3</sub><sup>-</sup> and OM dominant, S: SO<sub>4</sub><sup>2-</sup> dominant, SN: SO<sub>4</sub><sup>2-</sup> and NO<sub>3</sub><sup>-</sup> dominant, SO: SO<sub>4</sub><sup>2-</sup> and OM dominant, O: OM dominant, ON: OM and NO<sub>3</sub><sup>-</sup> dominant, OS: OM and SO<sub>4</sub><sup>2-</sup> dominant), (e) T, and (f) RH, (g) the overall change characteristics of WS and WD in the NCP from June 24 to 29, 2021.

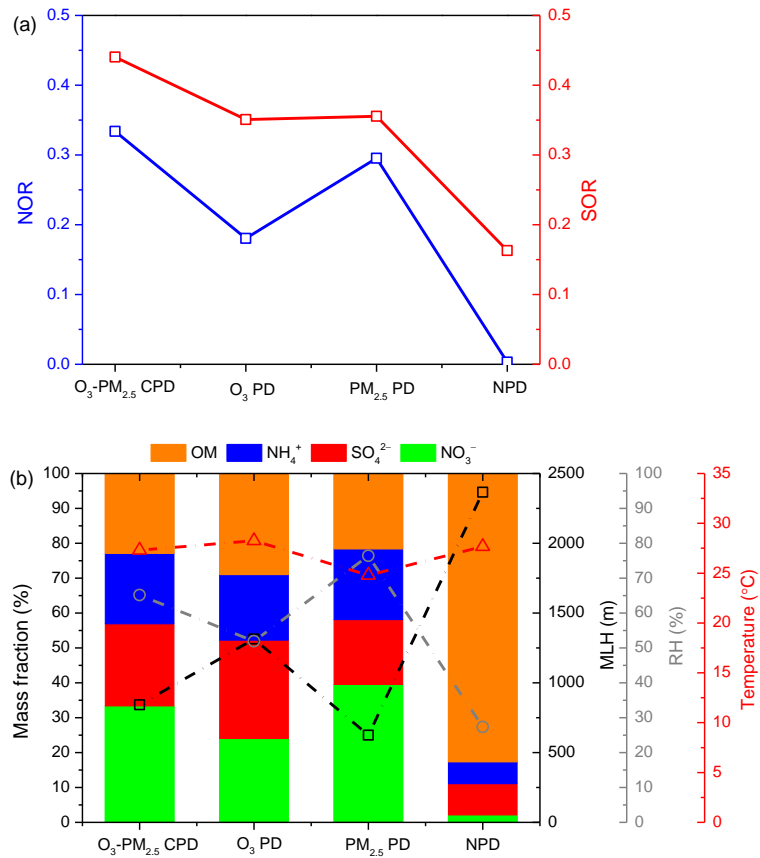

**Figure R9.** The distribution characteristics of (a) NOR and SOR, and (b) the mass fractions of major PM<sub>2.5</sub> components, MLH, RH, and T under O<sub>3</sub>-PM<sub>2.5</sub> CPD, O<sub>3</sub> PD, PM<sub>2.5</sub> PD, and NPD conditions from June 24 to 29, 2021.



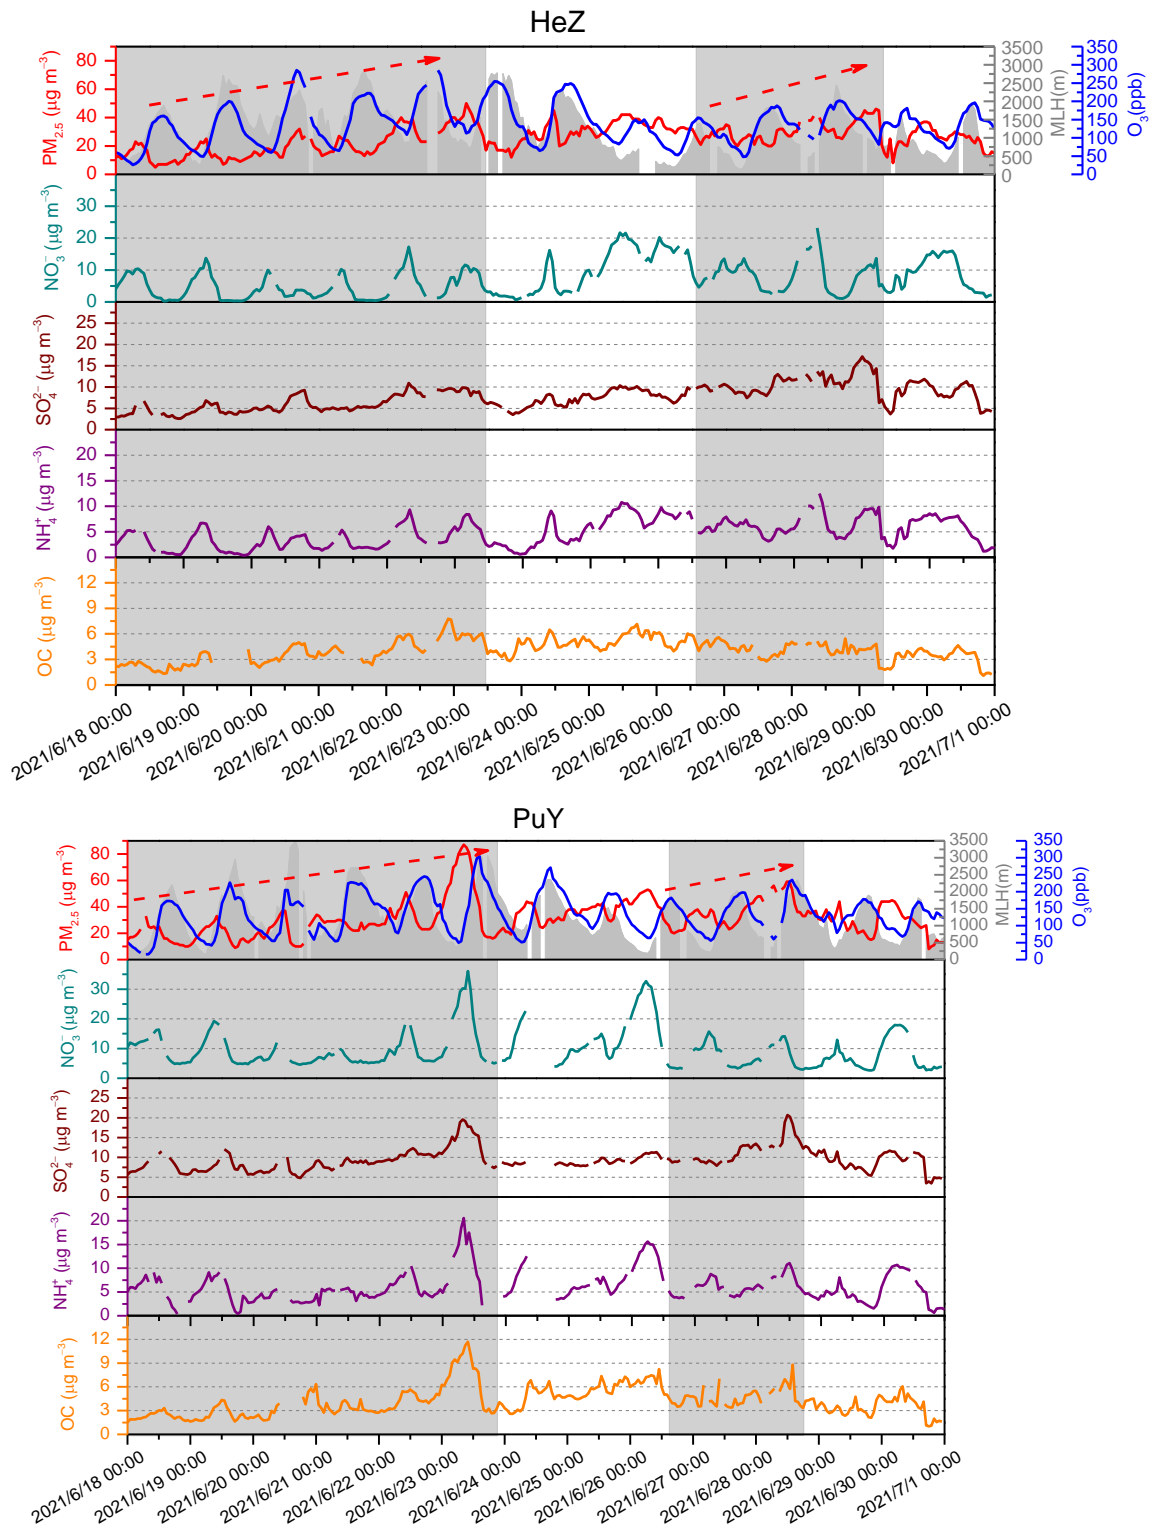

**Figure R10.** The hourly evolution of O<sub>3</sub>, PM<sub>2.5</sub>, its components and MLH in HeZ and PuY during June 18–29, 2021.

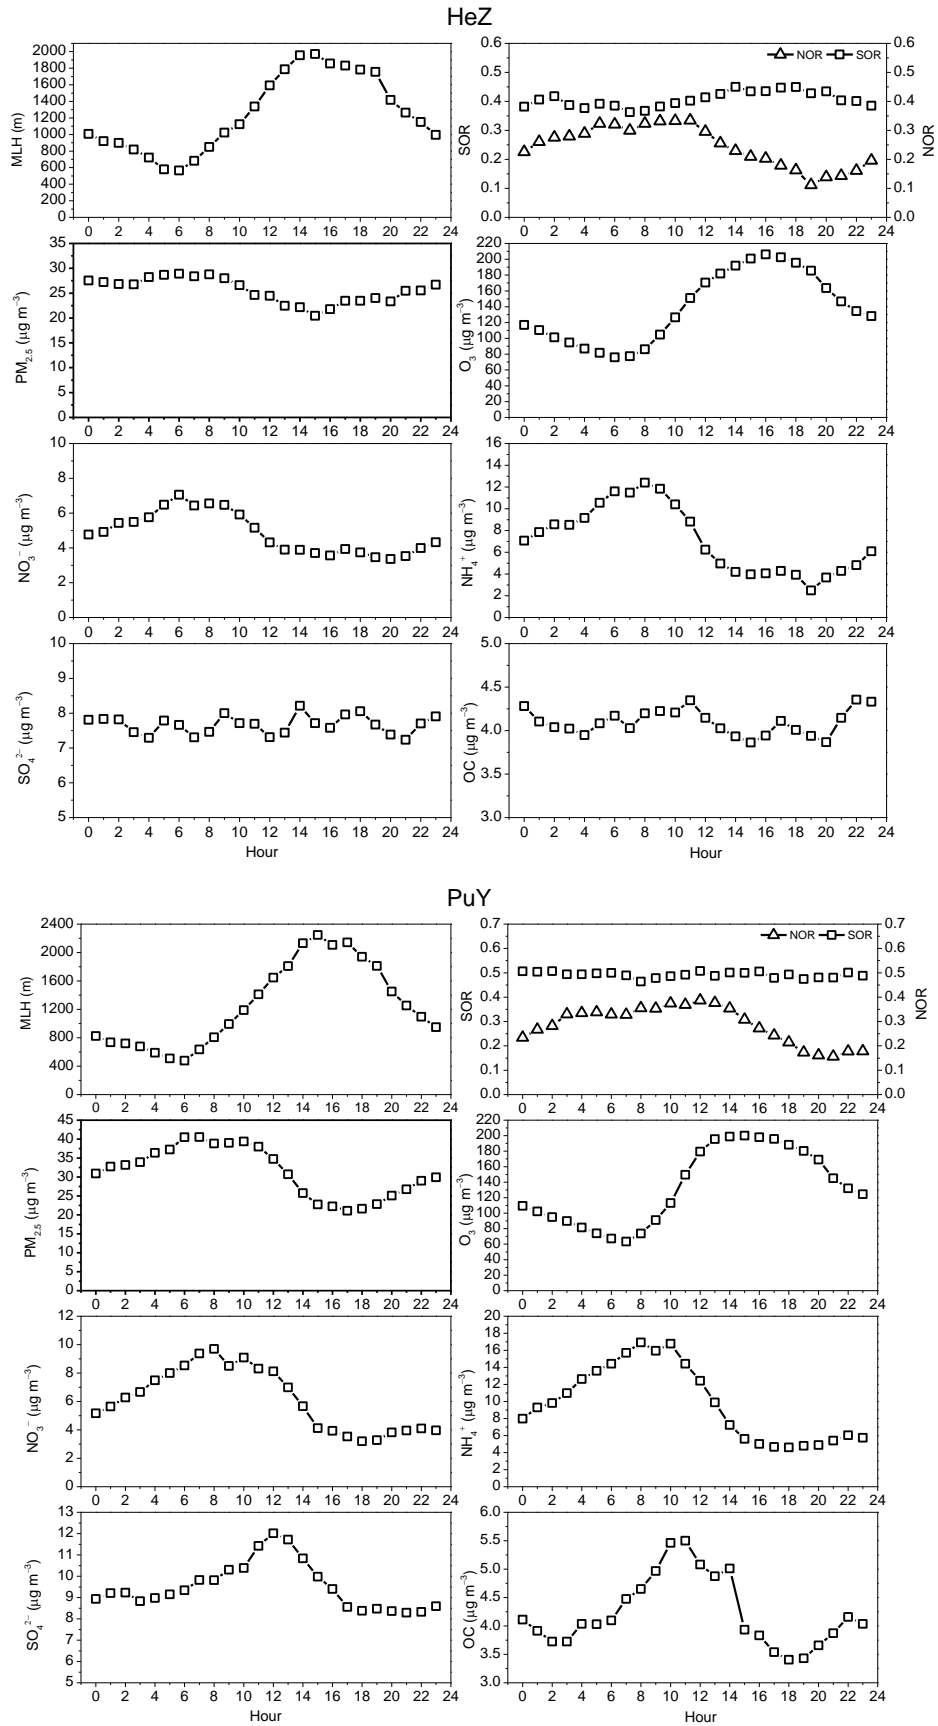

**Figure R11.** The diurnal variation of MLH, SOR, NOR, O<sub>3</sub>, PM<sub>2.5</sub>, and its components in HeZ and PuY during June 18–29, 2021.
